# Supplementary material
Source: PubMed Central journal article supplement (PMC5937529)
Supplement: NIHMS931855-supplement-2.pdf [file NIHMS931855-supplement-2.pdf]

## Supplemental Materials

### Enhancing Sensitivity of Liquid Chromatography/Mass Spectrometry of Peptides and Proteins Using Supercharging Agents

Michael Nshanian<sup>1</sup>, Rajeswari Lakshmanan<sup>1</sup>, Hao Chen<sup>3</sup>, Rachel R. Ogorzalek Loo<sup>2</sup>, and Joseph A. Loo<sup>1,2\*</sup>

<sup>1</sup>Department of Chemistry and Biochemistry, University of California-Los Angeles, Los Angeles, CA 90095

<sup>2</sup>Department of Biological Chemistry, David Geffen School of Medicine at UCLA, Molecular Biology Institute, and UCLA/DOE Institute for Genomics and Proteomics, University of California-Los Angeles, Los Angeles, CA 90095

<sup>3</sup>Center for Intelligent Chemical Instrumentation, Department of Chemistry and Biochemistry, Edison Biotechnology Institute, Ohio University, Athens, OH 45701

Submitted to:  
*International Journal of Mass Spectrometry*  
November 2017

\*Corresponding author.  
E-mail address: JLoo@chem.ucla.edu (J. A. Loo)

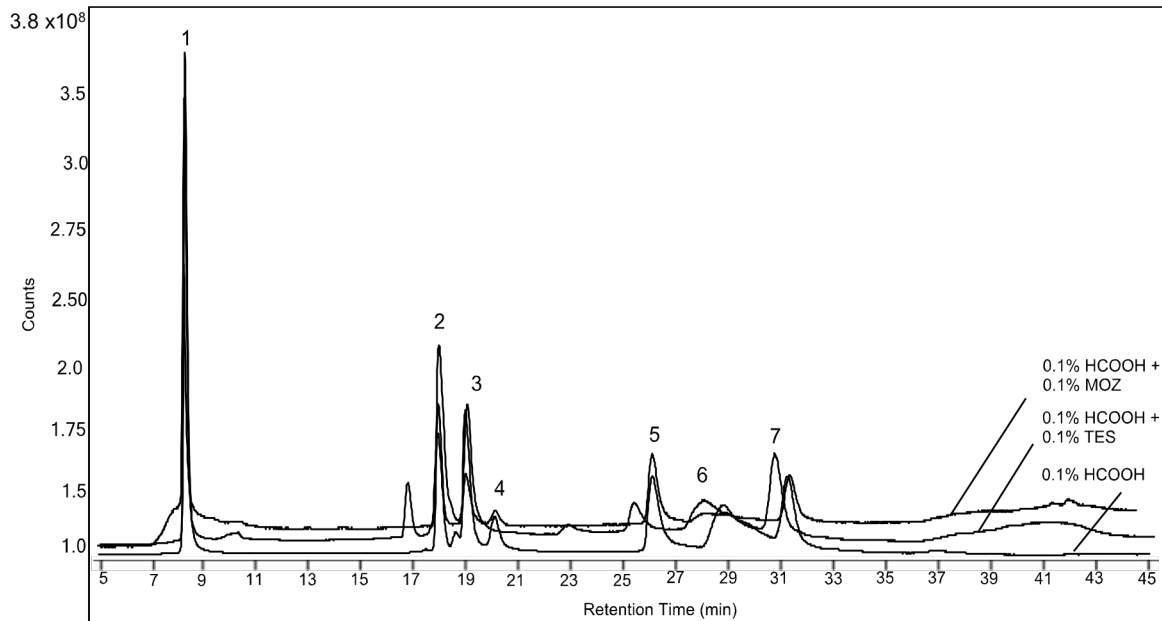

**Supplemental Figure S1.** LC/MS of protein mixture containing (1) 17  $\mu\text{M}$  RNase A, (2) 13  $\mu\text{M}$  ubiquitin, (3) 7.7  $\mu\text{M}$  lysozyme, (4) 30  $\mu\text{M}$  insulin, (5) 6.5  $\mu\text{M}$  myoglobin, (6) 15  $\mu\text{M}$  BSA, and (7) 7.6  $\mu\text{M}$  carbonic anhydrase with 0.1% formic acid and 0.1% TES and 0.1% MOZ.

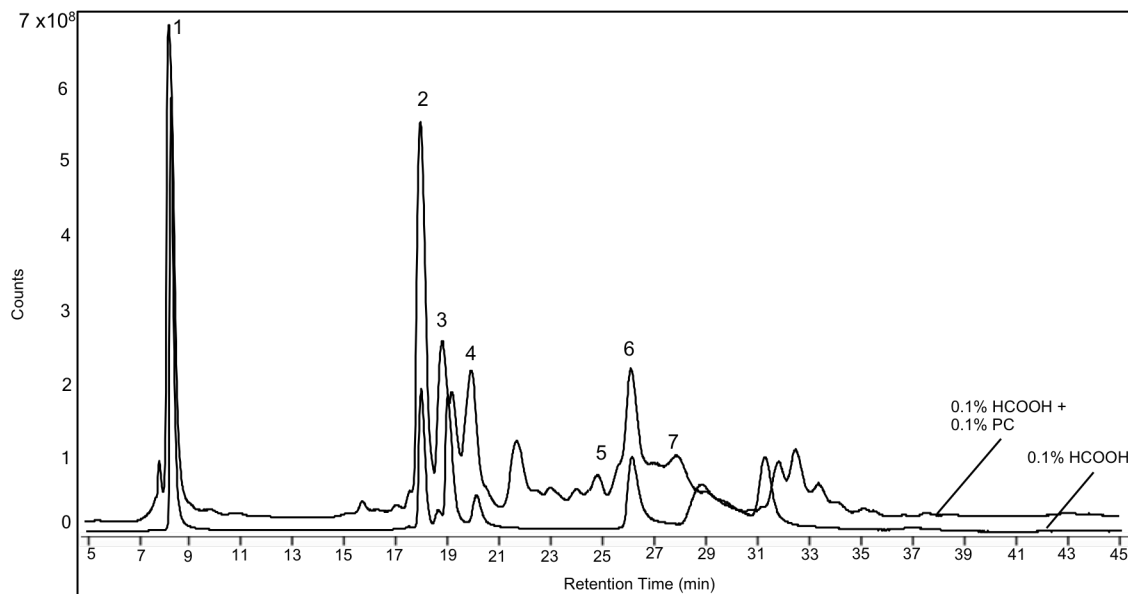

**Supplemental Figure S2.** LC/MS of protein mixture containing (1) 17  $\mu\text{M}$  RNase A, (2) 13  $\mu\text{M}$  ubiquitin, (3) 7.7  $\mu\text{M}$  lysozyme, (4) 30  $\mu\text{M}$  insulin, (5) 6.5  $\mu\text{M}$  myoglobin, (6) 15  $\mu\text{M}$  BSA, and (7) 7.6  $\mu\text{M}$  carbonic anhydrase with 0.1% formic acid and with and without 0.1% PC.

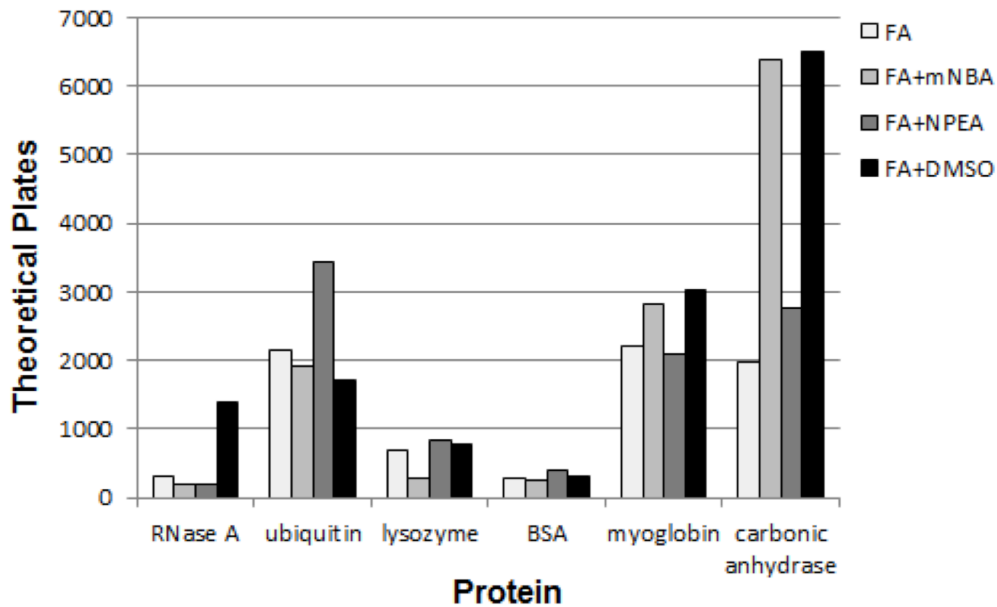

**Supplemental Figure S3.** Number of theoretical plates for LC/MS of proteins with 0.1% formic acid and supercharging agents.

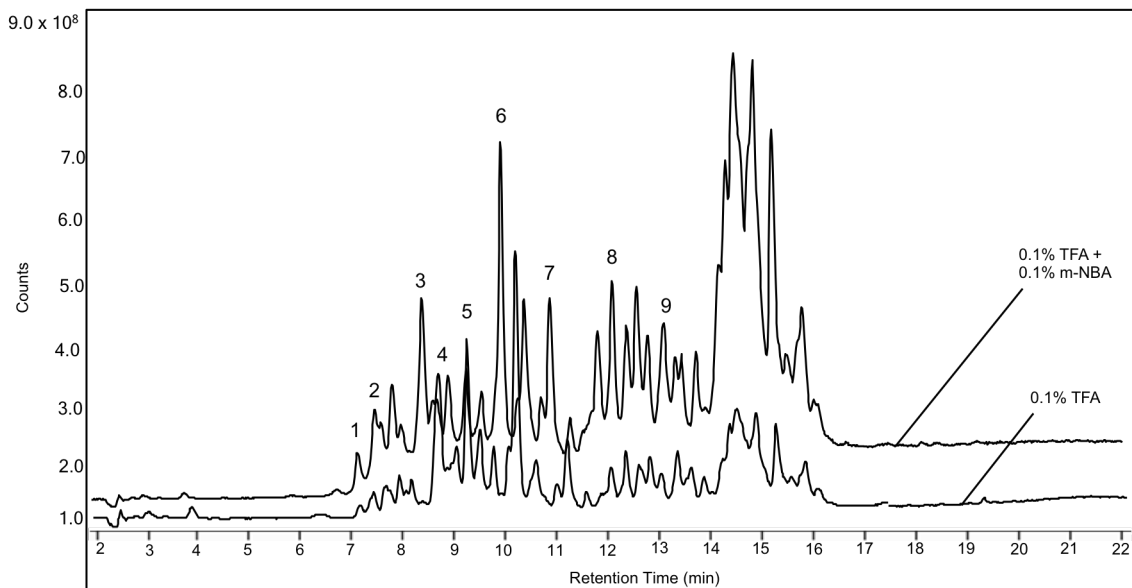

**Supplemental Figure S4.** LC/MS of BSA tryptic digest in 0.1% TFA with and without 0.1% *m*-NBA. Tryptic peptides: (1) ATEEQLK, (2) YICDNQDTISSK, (3) VPQVSTPTLVEVSR, (4) LFTFHADICTLPDTEK, (5) HLVDEPQNLIK, (6) ECCDKPLLEK, (7) YNGVFQECCQAEDK, (8) TVMENFVAFVDK, (9) QTALVELLK

Retention time (min)

| protein            | TFA   | + <i>m</i> -NBA | + 3-NPEA | + TES | + MOZ | + PC  |
|--------------------|-------|-----------------|----------|-------|-------|-------|
| RNase A            | 18.20 | 18.53           | 18.32    | 17.06 | 18.20 | 16.33 |
| Ubiquitin          | 24.29 | 24.82           | 24.48    | 23.47 | 24.42 | 22.37 |
| Lysozyme           | 28.18 | 28.92           | 28.41    | 27.59 | 28.27 | N/D   |
| BSA                | 33.56 | 34.43           | 33.80    | 33.00 | 33.68 | 31.05 |
| Myoglobin          | 37.36 | 37.84           | 37.66    | 36.83 | 37.41 | 35.24 |
| Carbonic Anhydrase | 38.45 | 38.63           | 38.55    | 38.34 | 38.46 | 39.18 |

Retention time (min)

| Protein            | HCOOH | + <i>m</i> -NBA | + 3-NPEA | + TES | + MOZ | + PC  |
|--------------------|-------|-----------------|----------|-------|-------|-------|
| RNase A            | 7.95  | 7.85            | 7.68     | 7.84  | 7.89  | 7.84  |
| Ubiquitin          | 17.99 | 18.01           | 17.62    | 16.74 | 18.03 | 17.81 |
| Lysozyme           | 20.10 | 20.26           | 19.80    | 19.11 | 20.30 | 19.81 |
| BSA                | 28.12 | 28.47           | 28.12    | 25.76 | 26.59 | 26.09 |
| Myoglobin          | 26.65 | 26.93           | 26.54    | 28.61 | 28.78 | 27.89 |
| Carbonic Anhydrase | 32.26 | 32.75           | 32.03    | 31.33 | 32.11 | 32.62 |

**Supplemental Figure 5.** Protein retention times with TFA (top) or formic acid (bottom) as the mobile phase additive.

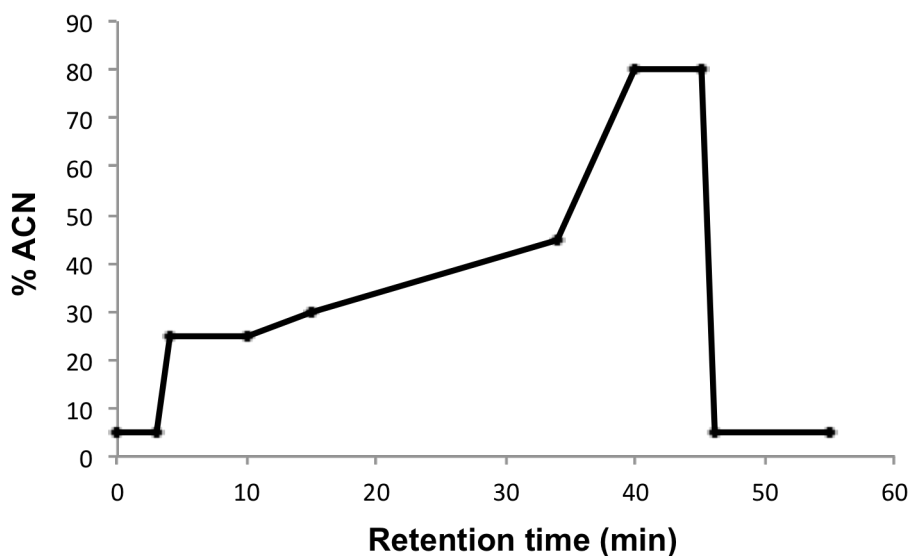

**Supplemental Figure 6.** LC gradient showing % ACN change as a function of time.

| <b>Protein</b>     | <b>+ mNBA</b> | <b>+ NPEA</b> | <b>+ TES</b> | <b>+ MOZ</b> | <b>+ PC</b> |
|--------------------|---------------|---------------|--------------|--------------|-------------|
| RNase A            | 2.5           | 7             | 1.3          | no change    | 1.2         |
| Ubiquitin          | 3             | 6             | 1.25         | no change    | 2.5         |
| Lysozyme           | 5             | 8             | 1.7          | no change    | 1.3         |
| BSA                | no change     | no change     | no change    | no change    | 1.8         |
| Myoglobin          | no change     | no change     | no change    | no change    | 1.4         |
| Carbonic Anhydrase | no change     | 3             | no change    | no change    | no change   |

**Supplemental Figure 7.** Signal enhancement (fold increase) with addition of supercharging agents to 0.1% FA ion pairing agent.
